# Supplementary material for: Engineered reproductively isolated species drive reversible population replacement
Source: PubMed Central journal article supplement (PMC8173020; doi:10.1038/s41467-021-23531-z), 2021-06-02
Supplement: 41467_2021_23531_MOESM3_ESM.pdf [file 41467_2021_23531_MOESM3_ESM.pdf]

## Reporting Summary

Nature Research wishes to improve the reproducibility of the work that we publish. This form provides structure for consistency and transparency in reporting. For further information on Nature Research policies, see our [Editorial Policies](#) and the [Editorial Policy Checklist](#).

### Statistics

For all statistical analyses, confirm that the following items are present in the figure legend, table legend, main text, or Methods section.

n/a Confirmed

- The exact sample size ( $n$ ) for each experimental group/condition, given as a discrete number and unit of measurement
- A statement on whether measurements were taken from distinct samples or whether the same sample was measured repeatedly
- The statistical test(s) used AND whether they are one- or two-sided  
*Only common tests should be described solely by name; describe more complex techniques in the Methods section.*
- A description of all covariates tested
- A description of any assumptions or corrections, such as tests of normality and adjustment for multiple comparisons
- A full description of the statistical parameters including central tendency (e.g. means) or other basic estimates (e.g. regression coefficient) AND variation (e.g. standard deviation) or associated estimates of uncertainty (e.g. confidence intervals)
- For null hypothesis testing, the test statistic (e.g.  $F$ ,  $t$ ,  $r$ ) with confidence intervals, effect sizes, degrees of freedom and  $P$  value noted  
*Give  $P$  values as exact values whenever suitable.*
- For Bayesian analysis, information on the choice of priors and Markov chain Monte Carlo settings
- For hierarchical and complex designs, identification of the appropriate level for tests and full reporting of outcomes
- Estimates of effect sizes (e.g. Cohen's  $d$ , Pearson's  $r$ ), indicating how they were calculated

*Our web collection on [statistics for biologists](#) contains articles on many of the points above.*

### Software and code

Policy information about [availability of computer code](#)

Data collection

N/A

Data analysis

Code used to analyze drive experiment data and generate Figures 4-6 is available on GitHub at <https://github.com/Marshalllab/SPECIES>. Illumina Reads were mapped to the Drosophila melanogaster genome (BDGP release 6, Gen Bank accession GCA\_000001215.4) using STAR aligner 2.7.6a. Base calls were performed with RTA 1.18.64 followed by conversion to FASTQ with bcl2fastq 1.8.4. Data was analyzed with GraphPad Prism version 8.2.1 for Windows (GraphPad Software, San Diego CA, [www.graphpad.com](http://www.graphpad.com)).

For manuscripts utilizing custom algorithms or software that are central to the research but not yet described in published literature, software must be made available to editors and reviewers. We strongly encourage code deposition in a community repository (e.g. GitHub). See the Nature Research [guidelines for submitting code & software](#) for further information.

### Data

Policy information about [availability of data](#)

All manuscripts must include a [data availability statement](#). This statement should provide the following information, where applicable:

- Accession codes, unique identifiers, or web links for publicly available datasets
- A list of figures that have associated raw data
- A description of any restrictions on data availability

The RNA sequencing data generated in this study is available at NCBI SRA under accession number PRJNA578541 (<https://www.ncbi.nlm.nih.gov/bioproject/PRJNA578541>). All plasmids and annotated DNA sequence maps are available at [www.addgene.com](http://www.addgene.com) under accession numbers; 112686 (<https://www.addgene.org/112686/>); 124999 (<https://www.addgene.org/124999/>); 125000 (<https://www.addgene.org/125000/>); 125001 (<https://www.addgene.org/125001/>); 125002 (<https://www.addgene.org/125002/>); 125003 (<https://www.addgene.org/125003/>); 125004 (<https://www.addgene.org/125004/>); 125005 (<https://www.addgene.org/125005/>); 125006 (<https://www.addgene.org/125006/>); 125007 (<https://www.addgene.org/125007/>)

[www.addgene.org/125007/](http://www.addgene.org/125007/)). The fly strains engineered in this study and used to generate SPECIES A1 will be available at the Bloomington fly stock center with the stock numbers 79005 (<https://bdsc.indiana.edu/Home/Search?presearch=79005>) , 91792 (<https://bdsc.indiana.edu/Home/Search?presearch=91792>) , 91791 (<https://bdsc.indiana.edu/Home/Search?presearch=91791> ).SPECIES fly lines will be made available from the corresponding author upon reasonable request upon agreement to suggested guidelines for the laboratory confinement of gene-drive systems 13,44.

## Field-specific reporting

Please select the one below that is the best fit for your research. If you are not sure, read the appropriate sections before making your selection.

Life sciences  Behavioural & social sciences  Ecological, evolutionary & environmental sciences

For a reference copy of the document with all sections, see [nature.com/documents/nr-reporting-summary-flat.pdf](https://www.nature.com/documents/nr-reporting-summary-flat.pdf)

## Life sciences study design

All studies must disclose on these points even when the disclosure is negative.

|                 |                                                                                                                                            |
|-----------------|--------------------------------------------------------------------------------------------------------------------------------------------|
| Sample size     | At least three biological replicates were performed per experiment. These sample sizes are sufficient as we performing genetic experiments |
| Data exclusions | No data was excluded                                                                                                                       |
| Replication     | At least three biological replicates were performed per experiment, and each experiment was successful.                                    |
| Randomization   | Flies were blindly chosen at random                                                                                                        |
| Blinding        | Flies were blindly chosen at random                                                                                                        |

## Reporting for specific materials, systems and methods

We require information from authors about some types of materials, experimental systems and methods used in many studies. Here, indicate whether each material, system or method listed is relevant to your study. If you are not sure if a list item applies to your research, read the appropriate section before selecting a response.

### Materials & experimental systems

| n/a                                 | Involvement in the study                                        |
|-------------------------------------|-----------------------------------------------------------------|
| <input type="checkbox"/>            | <input checked="" type="checkbox"/> Antibodies                  |
| <input checked="" type="checkbox"/> | <input type="checkbox"/> Eukaryotic cell lines                  |
| <input checked="" type="checkbox"/> | <input type="checkbox"/> Palaeontology and archaeology          |
| <input type="checkbox"/>            | <input checked="" type="checkbox"/> Animals and other organisms |
| <input checked="" type="checkbox"/> | <input type="checkbox"/> Human research participants            |
| <input checked="" type="checkbox"/> | <input type="checkbox"/> Clinical data                          |
| <input checked="" type="checkbox"/> | <input type="checkbox"/> Dual use research of concern           |

### Methods

| n/a                                 | Involvement in the study                        |
|-------------------------------------|-------------------------------------------------|
| <input checked="" type="checkbox"/> | <input type="checkbox"/> ChIP-seq               |
| <input checked="" type="checkbox"/> | <input type="checkbox"/> Flow cytometry         |
| <input checked="" type="checkbox"/> | <input type="checkbox"/> MRI-based neuroimaging |

## Antibodies

|                 |                                                                                                                                                                                                                                                                                                                                                                                                                                                                                 |
|-----------------|---------------------------------------------------------------------------------------------------------------------------------------------------------------------------------------------------------------------------------------------------------------------------------------------------------------------------------------------------------------------------------------------------------------------------------------------------------------------------------|
| Antibodies used | For antibody staining, embryos were collected overnight and then fixed and dechorionated using standard protocols 38. We used guinea pig anti-Runt polyclonal antibody (kindly provided by David Kosman and John Reinitz) at a concentration of 1:200 and mouse anti-Eve monoclonal 3C10 (developed by C. Goodman and available from the Developmental Studies Hybridoma Bank) at 1:20. Nuclei were counterstained with DAPI. Embryos were stained using standard protocols 39. |
| Validation      | used to stain control embryos.                                                                                                                                                                                                                                                                                                                                                                                                                                                  |

## Animals and other organisms

Policy information about [studies involving animals](#); [ARRIVE guidelines](#) recommended for reporting animal research

|                         |                                                                                                                                                                                                                                  |
|-------------------------|----------------------------------------------------------------------------------------------------------------------------------------------------------------------------------------------------------------------------------|
| Laboratory animals      | Drosophila melanogaster, both males and females, age included all stages of development. We also used five Global Diversity Lines (from Beijing, China; Ithaca, NY; the Netherlands; Tasmania, Australia; and Zimbabwe, Africa). |
| Wild animals            | No wild animals were used in this study                                                                                                                                                                                          |
| Field-collected samples | No Field-collected samples were used in this study                                                                                                                                                                               |

Ethics oversight

We have complied with all relevant ethical regulations for animal testing and research and conformed to the UCSD institutionally approved biological use authorization protocol (BUA #R2401).

Note that full information on the approval of the study protocol must also be provided in the manuscript.
